# Supplementary material
Source: PubMed Central journal article supplement (PMC3037555)
Supplement: mmc1.pdf [file mmc1.pdf]

Biophysical Journal, Volume 100

**Supporting Material**

**INTERACTION OF DIVERSE VOLTAGE SENSOR HOMOLOGUES WITH LIPID  
BILAYERS REVEALED BY SELF-ASSEMBLY SIMULATIONS**

*Younes Mokrab and Mark S. P. Sansom*

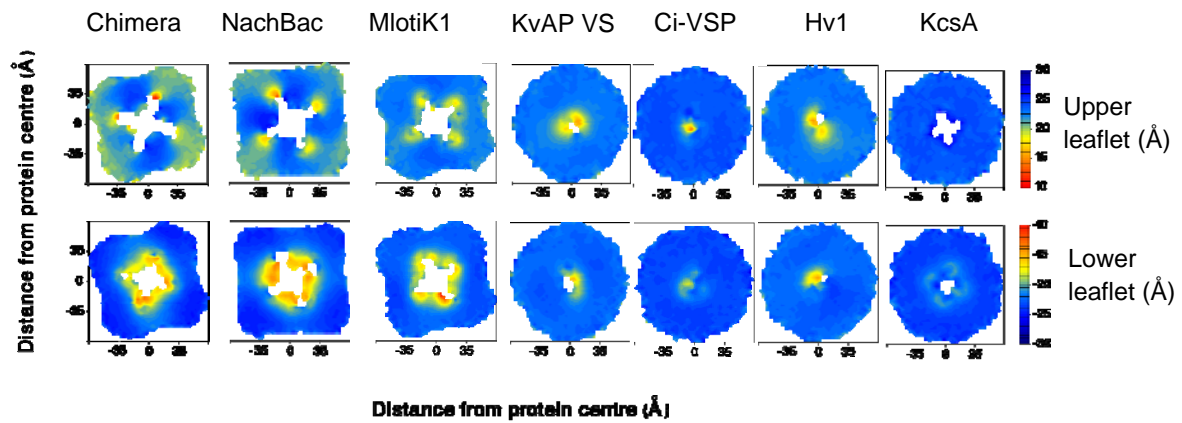

**Figure S1.** VS domains cause a major distortion to the DOPC during simulations (related to Figure 3). Contour plots show the average position relative to the membrane centre of lipid phosphate groups of the upper or the lower leaflet averaged over the last 220 ns of the simulations.

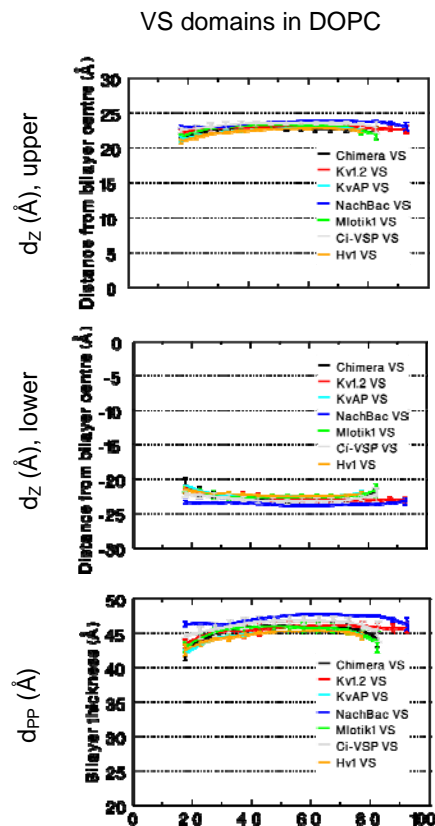

**Figure S2.** Impact of isolated VS domains on DOPC lipid bilayer structure (related to Figure 4). The average positions of phosphate groups in the upper leaflet (top), the lower leaflet (middle), and bilayer thickness (bottom) plotted against the radial distance from the protein centre of mass. Error bars represent 95% confidence intervals.

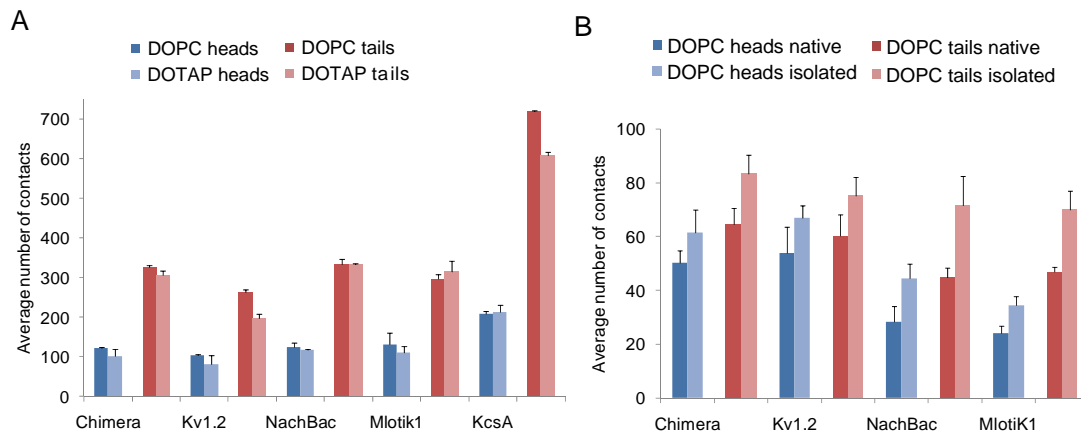

**Figure S3. (A)** Pore domains of VS homologues interaction with lipids is unaffected by the absence of phosphate head groups (related to Figure 6). Plotted is the average number of contacts between the pore domains and lipid heads or tails in simulations of the native channel tetramers in either in DOPC or DOTAP. KcsA is shown for comparison. **(B)** Increased interaction of paddle motifs with DOPC lipids in isolated VS domains relative to those in VS domains that are part of the native channel tetramers (related to Figure 5). Error bars represent 95% confidence intervals.

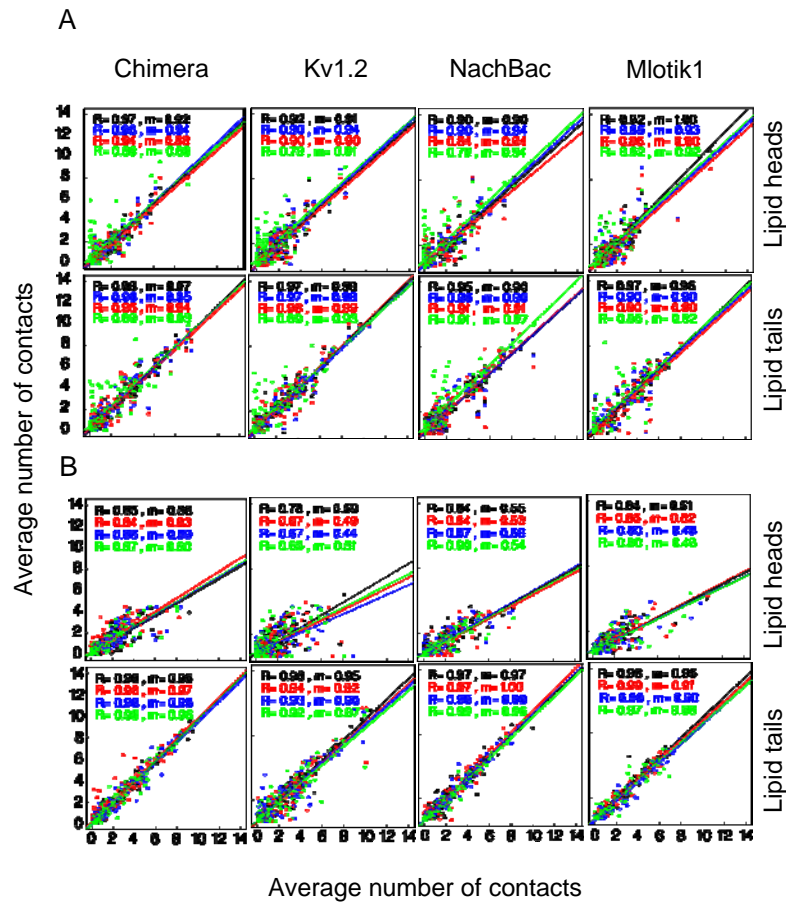

**Figure S4.** (A) VS domains in tetrameric channels show symmetrical lipid interactions during the simulations. Plotted is the correlation between the average protein side chain-lipid contacts made by one VS domain and those made by each of the other three VS domains in the same tetramer (black, blue and red), and by the VS domain simulated in isolation (green). (B) All four VS in the various channels are affected similarly by the absence of lipid phosphate groups. Plotted is the correlation between DOPC and DOTAP contacts for each VS domain in each tetrameric channel. Correlation coefficients (R) and slopes (m) are indicated.

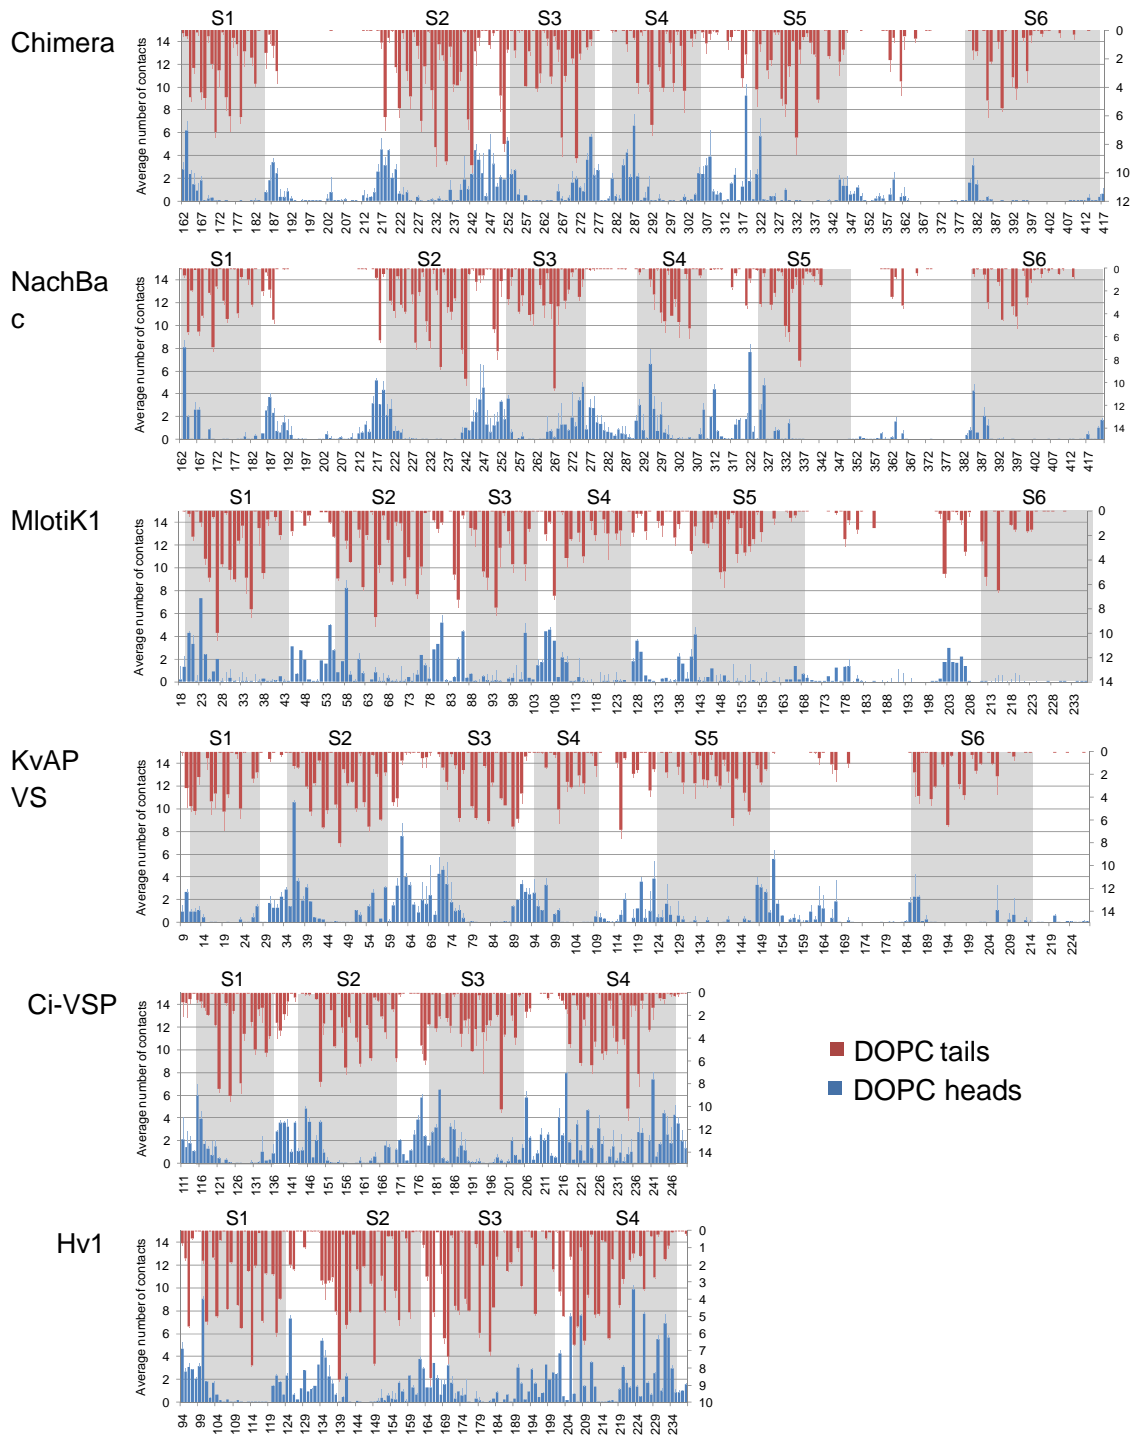

**Figure S5.** Lipid interaction profiles for various VS homologues. The average (over each MD simulation) of the number of contacts with lipid (DOPC) head groups (blue) and tail groups (red) are shown as a function of residue number for the various VS homologues. The grey blocks indicate the positions of the TM helices. Error bars represent 95% confidence intervals.

Table S1. Details of Molecular Dynamics simulations performed (Related to Methods).

| <b>VS homologue</b> | <b>Time (ns)</b> | <b>Bilayer</b> | <b>Repeats</b> | <b>lipids</b> | <b>Water</b> | <b>Counter charge ions</b> | <b>Box size (Å)</b> |
|---------------------|------------------|----------------|----------------|---------------|--------------|----------------------------|---------------------|
| Chimera             | 320              | DOPC           | x3             | 356           | 9960         | 0                          | 15x15x13            |
|                     | 320              | DOTAP          | x3             | 389           | 9979         | Cl <sup>-</sup> (778)      | 15x15x13            |
| Kv1.2               | 320              | DOPC           | x3             | 361           | 9877         | Na <sup>+</sup> (40)       | 15x15x13            |
|                     | 320              | DOTAP          | x3             | 389           | 9995         | Cl <sup>-</sup> (738)      | 15x15x13            |
| NachBac             | 320              | DOPC           | x3             | 379           | 10372        | Cl <sup>-</sup> (64)       | 15x15x13            |
|                     | 320              | DOTAP          | x3             | 387           | 9952         | Cl <sup>-</sup> (838)      | 15x15x13            |
| MlotiK1             | 320              | DOPC           | x3             | 373           | 10773        | Cl <sup>-</sup> (46)       | 15x15x13            |
|                     | 320              | DOTAP          | x3             | 392           | 9988         | Cl <sup>-</sup> (830)      | 15x15x13            |
| KvAP VS             | 320              | DOPC           | x3             | 273           | 7475         | Cl <sup>-</sup> (2)        | 15x15x13            |
|                     | 320              | DOTAP          | x3             | 322           | 8247         | Cl <sup>-</sup> (646)      | 15x15x13            |
| Ci <sup>v</sup> sp  | 320              | DOPC           | x3             | 286           | 7832         | 0                          | 13x13x13            |
|                     | 320              | DOTAP          | x3             | 318           | 8262         | Cl <sup>-</sup> (636)      | 13x13x13            |
| Hv1                 | 320              | DOPC           | x3             | 285           | 7833         | Cl <sup>-</sup> (6)        | 13x13x13            |
|                     | 320              | DOTAP          | x3             | 322           | 8224         | Cl <sup>-</sup> 650        | 13x13x13            |
| Chimera VS          | 320              | DOPC           | x3             | 285           | 7728         | Cl <sup>-</sup> (8)        | 13x13x13            |
| Kv1.2 VS            | 320              | DOPC           | x3             | 286           | 7728         | 0                          | 13x13x13            |
| NachBac VS          | 320              | DOPC           | x3             | 290           | 7818         | Cl <sup>-</sup> (22)       | 13x13x13            |
| Mlotik1 VS          | 320              | DOPC           | x3             | 284           | 7843         | Cl <sup>-</sup> (10)       | 13x13x13            |
| KcsA                | 320              | DOPC           | x3             | 275           | 7525         | Cl <sup>-</sup> (16)       | 13x13x13            |
|                     | 320              | DOTAP          | x3             | 309           | 7904         | Cl <sup>-</sup> (634)      | 13x13x13            |
| MScI                | 320              | DOPC           | x3             | 405           | 10942        | 0                          | 15x15x13            |
|                     | 320              | DOTAP          | x3             | 488           | 12477        | Cl <sup>-</sup> (976)      | 15x15x15            |
